# Supplementary material for: SHIFT: a spatial-heterogeneity improvement in DEM-based mapping of global geomorphic floodplains
Source: Copernicus journal article supplement (doi:10.5194/essd-16-3873-2024), 2024-08-28

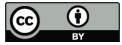

*Supplement of*

## **SHIFT: a spatial-heterogeneity improvement in DEM-based mapping of global geomorphic floodplains**

**Kaihao Zheng et al.**

*Correspondence to:* Peirong Lin ([peironglinlin@pku.edu.cn](mailto:peironglinlin@pku.edu.cn))

The copyright of individual parts of the supplement might differ from the article licence.

**Table S1. Correlation of FHG parameter  $b$  from HydroBASINS Level-3 to Level-5 basins and relevant hydroclimatic factors.** This table presents the correlation of the FHG parameter  $b$  from HydroBASINS level-3 to level-5 basins with relevant hydroclimatic factors. Tests at different scales (level-4 and level-5 basins) are added to increase the sample size and confirmed that AI and LAI have statistically significant relationships with the exponent  $b$ . Terrain factors, specifically elevation mean and standard deviation, exhibited significant but weaker positive correlations with level-4 and level-5 basins. Soil factors showed inconsistent and generally insignificant correlations. The results for level-4 and level-5 basins were filtered to include only basins with at least 1000 reference grids at a 1-km resolution, ensuring reliable estimation of  $b$ . The 33 largest basins are those presented in Figure 4 of the revised manuscript. Terrain data are sourced from MERIT-Hydro. Soil data are derived from the Soilgrids 2.0 dataset (Poggio et al., 2021), with zonal averages calculated within a 10-km buffer based on hydrological distance. While some correlations are not very strong, the results meet expectations, highlighting AI as a primary factor, with LAI playing a secondary role, and the other factors showing less observable mechanisms.

|                | AI       | LAI      | Elevation<br>Mean | Elevation<br>STD | Clay   | Silt   | Sand   |        |
|----------------|----------|----------|-------------------|------------------|--------|--------|--------|--------|
| <b>Level-3</b> | All      | 0.335*** | 0.083             | -0.007           | 0.121  | 0.152* | 0.170* | -0.041 |
|                | Largest  | 0.680*** | 0.668***          | -0.165           | 0.208  | 0.314  | -0.134 | -0.042 |
| <b>Level-4</b> | 0.338*** | 0.256*** | 0.131**           | 0.246***         | -0.067 | 0.050  | -0.003 |        |
| <b>Level-5</b> | 0.405*** | 0.349*** | 0.104***          | 0.188***         | -0.033 | -0.019 | 0.033  |        |

Note: \*\*\* indicates  $p < 0.001$ , \*\* indicates  $p < 0.01$ , \* indicates  $p < 0.05$ .

**Figure S1. Spatial Distribution of parameter  $a$ .** The coefficient  $a$ , which varies from 0.0001 to a maximum of 0.12 across all basins, is also optimized. The spatial pattern of parameter  $a$  is less clear due to its dependence on the estimated parameter  $b$ . Generally, basins with lower  $a$  values correspond to those with larger  $b$  values, particularly in arctic regions, suggesting a dynamic balance between these two parameters. However, this observation is not uniform across all regions, as seen in the Pearl River basin in Asia.

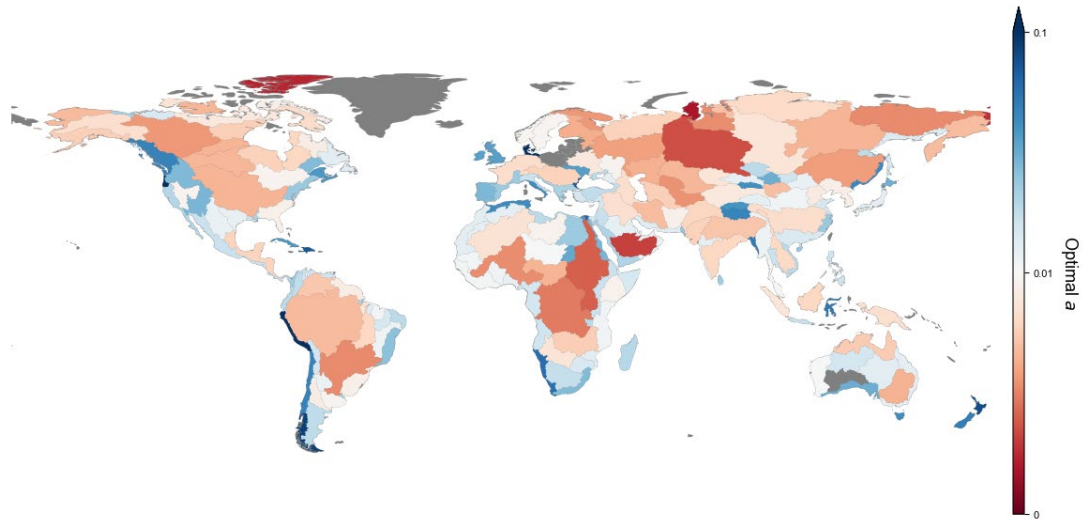

Supplement: Supplementary file 1 [file essd-16-3873-2024-supplement.pdf]
